# Supplementary material for: Modulating Tumor-Associated Macrophage Polarization by Synthetic and Natural PPARγ Ligands as a Potential Target in Breast Cancer
Source: MDPI journal article supplement (doi:10.3390/cells9010174), 2020-01-10
Supplement: s1 [file s1]

# Modulating Tumor-Associated Macrophage polarization by synthetic and natural PPAR $\gamma$ ligands as a potential target in breast cancer

Giulia Gionfriddo <sup>1,#</sup>, Pierluigi Plastina <sup>1,#</sup>, Giuseppina Augimeri <sup>1</sup>, Stefania Catalano <sup>1</sup>, Cinzia Giordano <sup>1</sup>, Ines Barone <sup>1</sup>, Catia Morelli <sup>1</sup>, Francesca Giordano <sup>1</sup>, Luca Gelsomino <sup>1</sup>, Diego Sisci <sup>1</sup>, Renger Witkamp <sup>2</sup>, Sebastiano Andò <sup>1</sup>, Klaske van Norren <sup>2,\*</sup>, Daniela Bonofiglio <sup>1,\*</sup>

<sup>1</sup> Department of Pharmacy, Health and Nutritional Sciences, University of Calabria, 87036 Arcavacata di Rende (CS), Italy; giu.gionfriddo@gmail.com (G.G.); pierluigi.plastina@unical.it (P.P.); giusy.augimeri@gmail.com (G.A.); stefania.catalano@unical.it (S.C.); cinzia.giordano@unical.it (C.G.); ines.barone@unical.it (I.B.); catia.morelli@unical.it (C.M.); francesca.giordano@unical.it (F.G.); luca.gelsomino@unical.it (L.G.); diego.sisci@unical.it (D.S.); sebastiano.ando@unical.it (S.A.); daniela.bonofiglio@unical.it (D.B.)

<sup>2</sup> Division of Human Nutrition and Health, Wageningen University, 6700 AA Wageningen, The Netherlands; renger.witkamp@wur.nl (R.W.); klaske.vannorren@wur.nl (K.v.N.)

# G.G. and P.P. equally contributed to this work.

\* Correspondence: daniela.bonofiglio@unical.it; Tel.: +39-0984-496208 (D.B.); klaske.vannorren@wur.nl @wur.nl; Tel.: +31-0317-485093 (K.v.N.)

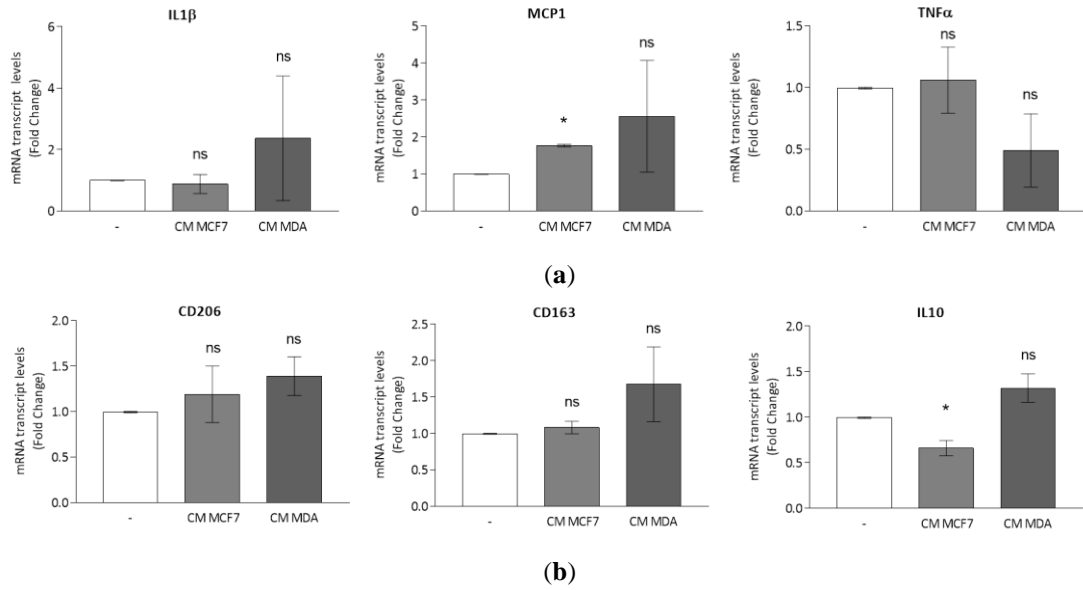

**Figure S1. Real-time RT-PCR of M1 and M2 markers in TAMs.** Real-time RT-PCR of M1 markers IL1 $\beta$ , MCP1, TNF $\alpha$  (a) and M2 markers CD206, CD163, IL10 (b) in M0 macrophages (-) incubated with CM MCF7 or CM MDA. Each sample was normalized on its RPS27A mRNA. Values represent means  $\pm$  SD of three different experiments, each performed with duplicate samples. The results are expressed as fold change respect to differentiated cells. \* $P < 0.05$ . ns= not significant.

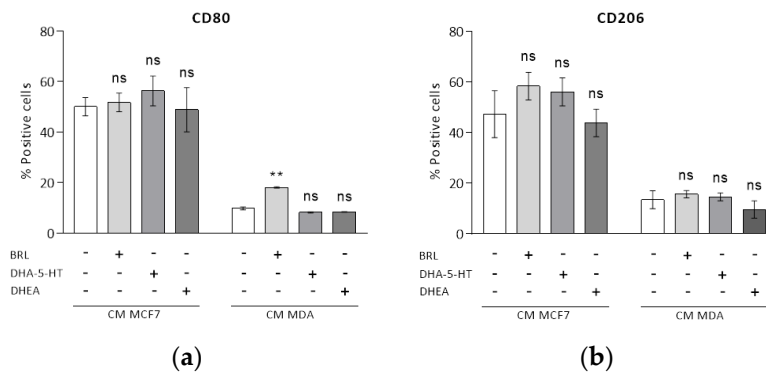

**Figure S2. Flow cytometry analyses of cell surface M1 and M2 markers in TAMs with rosiglitazone, DHA-5-HT or DHEA.** Flow cytometry analyses of M1 marker CD80 (a) and M2 marker CD206 (b) in M0 macrophages incubated with CM MCF7 or CM MDA and rosiglitazone (BRL) 10  $\mu$ M, DHA-5-HT 1  $\mu$ M or DHEA 5  $\mu$ M for 72 h. Data are expressed as means  $\pm$  SD. Each experiment was performed two times with duplicate samples. The results are expressed as percentage of positive cells respect to vehicle-treated cells (-).\*\*  $P < 0.005$ , ns= not significant.

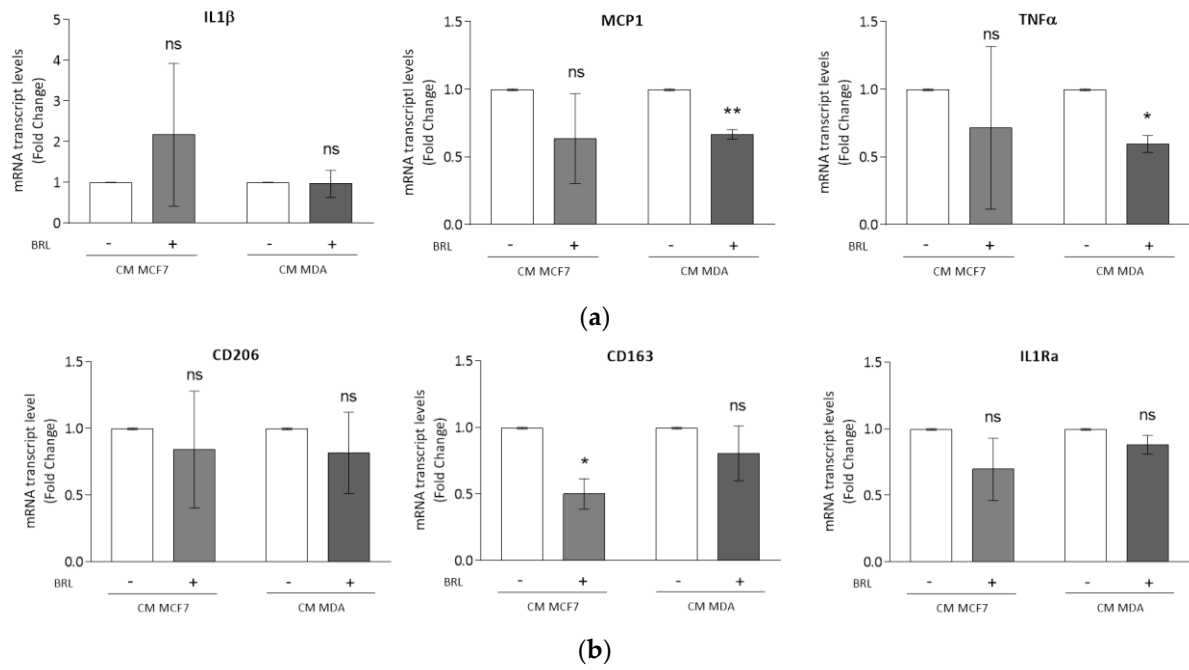

**Figure S3. Real-time RT-PCR of M1 and M2 markers in TAMs treated with rosiglitazone.** Real-time RT-PCR of M1 markers IL1 $\beta$ , MCP1, TNF $\alpha$  (a) and M2 markers CD206, CD163, IL1Ra (b) in M0 macrophages incubated with CM MCF7 or CM MDA and treated with rosiglitazone (BRL) 10  $\mu$ M for 72 h. Each sample was normalized on its RPS27A mRNA. Data are expressed as means  $\pm$  SD. Each experiment was performed two times with duplicate samples. The results are expressed as fold change respect to vehicle-treated cells (-). \* $P$  < 0.05, \*\* $P$  < 0.005, ns= not significant.

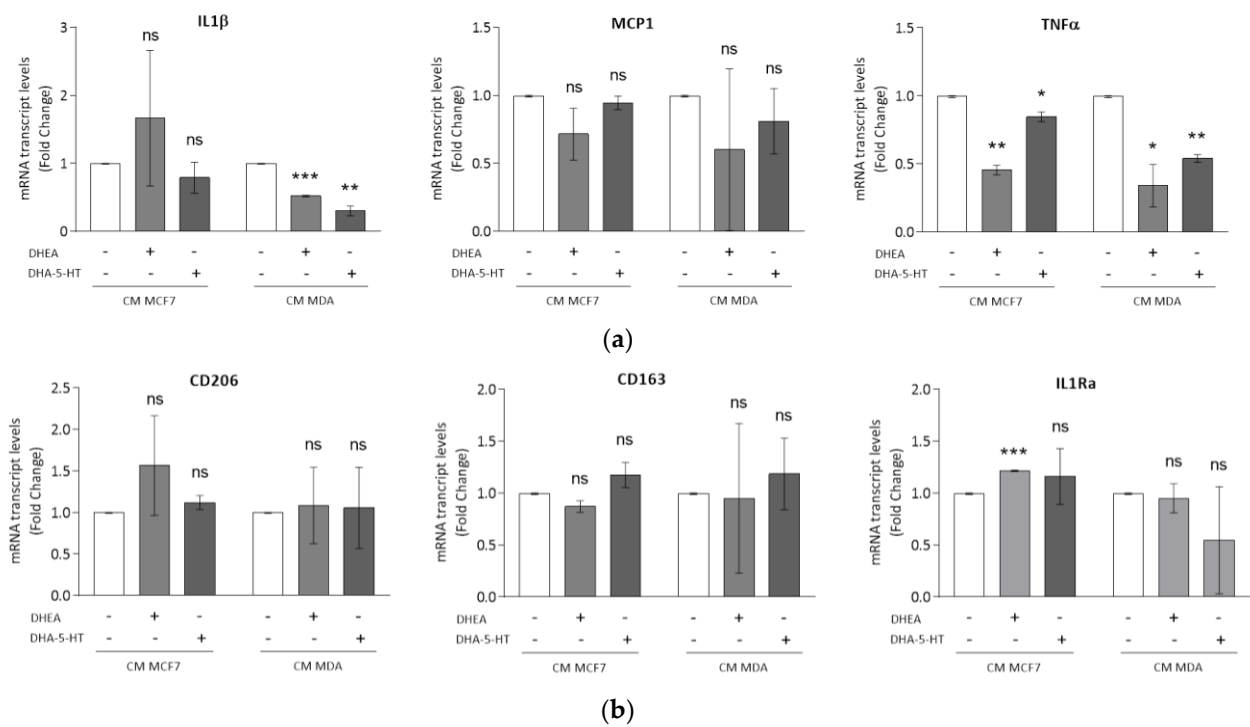

**Figure S4. Real-time RT-PCR of M1 and M2 markers in TAMs treated with DHEA or DHA-5-HT.** Real-time RT-PCR of M1 markers IL1 $\beta$ , MCP1, TNF $\alpha$  (a) and M2 markers CD206, CD163, IL1Ra (b) in M0 macrophages incubated with CM MCF7 or CM MDA and DHEA 5  $\mu$ M or DHA-5-HT 1  $\mu$ M for 72 h. Each sample was normalized on its RPS27A mRNA. Data are expressed as means  $\pm$  SD. Each experiment was performed two times with duplicate samples. The results are expressed as fold change respect to vehicle-treated cells (-). \* $P$  < 0.05, \*\* $P$  < 0.005, \*\*\* $P$  < 0.0005, ns= not significant.

**Table S1.** Oligonucleotide primers used in this study.

| <b>Gene name</b>                                 | <b>Gene symbol</b>             |         | <b>Primer Sequences</b>         |
|--------------------------------------------------|--------------------------------|---------|---------------------------------|
| Interleukin 6                                    | <i>IL6</i>                     | Forward | 5'- AACCTGAACCTTCCAAAGATGG -3'  |
|                                                  |                                | Reverse | 5'- TCTGGCTTGTTTCCTCACTACT-3'   |
| Interleukin 1 beta                               | <i>IL1<math>\beta</math></i>   | Forward | 5'- CACGATGCACCTGTACGATCA-3'    |
|                                                  |                                | Reverse | 5'- GTTGCTCCATATCCTGTCCCT-3'    |
| Monocyte Chemoattractant Protein 1               | <i>MCP1</i>                    | Forward | 5'- CCCCAGTCACCTGCTGTTAT-3'     |
|                                                  |                                | Reverse | 5'- AGATCTCCTTGGCCACAATG-3'     |
| Tumor Necrosis Factor alpha                      | <i>TNF<math>\alpha</math></i>  | Forward | 5'- ATGAGCACTGAAAGCATGATCC-3'   |
|                                                  |                                | Reverse | 5'- GAGGGCTGATTAGAGAGAGGTC-3'   |
| Mannose Receptor C-type 1, MRC1                  | <i>CD206</i>                   | Forward | 5'- GGGTTGCTATCACTCTCTATGC-3'   |
|                                                  |                                | Reverse | 5'- TTCTTGTCGTGTGCCGTAGTT-3'    |
| CD163 molecule                                   | <i>CD163</i>                   | Forward | 5'- ACTTGAAGACTCTGGATCTGCT-3'   |
|                                                  |                                | Reverse | 5'- CTGGTGACAAAACAGGCACTG-3'    |
| Interleukin 1 Receptor Antagonist                | <i>IL1RA</i>                   | Forward | 5'- GCCTCCGCAGTCACCTAAT-3'      |
|                                                  |                                | Reverse | 5'- TCCCAGATTCTGAAGGCTTG-3'     |
| Interleukin 10                                   | <i>IL10</i>                    | Forward | 5'- ACTTTAAGGGTTACCTGGGTTGC-3'  |
|                                                  |                                | Reverse | 5'- TCACATGCGCCTTGATGTCTG -3'   |
| Peroxisome Proliferator Activated Receptor gamma | <i>PPAR<math>\gamma</math></i> | Forward | 5'- GGCTTCATGACAAGGGAGTTTC-3'   |
|                                                  |                                | Reverse | 5'- AACTCAAACCTGGGCTCCATAAAG-3' |
| Ribosomal Protein S27A                           | <i>RPS27A</i>                  | Forward | 5'- GTTAAGCTGGCTGTCTGAAA-3'     |
|                                                  |                                | Reverse | 5'- CATCAGAAGGGCACTCTCG-3'      |
| 18S Ribosomal RNAs                               | <i>RNA18S</i>                  | Forward | 5'-CGGCGACGACCCATTGAAAC-3'      |
|                                                  |                                | Reverse | 5'-GAATCGGAACCCTGATTCCCCGTC-3'  |

**Table S2. Lactate dehydrogenase (LDH) release into supernatant media of BCC-CM, alone and with rosiglitazone, DHEA and DHA-5-HT.** Lactate dehydrogenase (LDH) release into supernatant media after 72 hour treatment with MCF-7 and MDA-MB-231 breast cancer cell conditioned media (CM), alone and with rosiglitazone (BRL), DHEA and DHA-5-HT. Absorbance of reduced formazan dye at 490 nM was normalized to the dispersion-media control. Triton X-100 was used as a positive control and represents 100% of LDH release.

| <b>Treatment</b> | <b>Concentration (<math>\mu\text{M}</math>)</b> | <b>Cytotoxicity (%)</b> |
|------------------|-------------------------------------------------|-------------------------|
| Triton-X-100     | -                                               | 100                     |
| MCF-7-CM         | -                                               | 24 $\pm$ 4              |
| MDA-MB-231-CM    | -                                               | 32 $\pm$ 6              |
| MCF-7-CM         | BRL                                             | 10                      |
|                  | DHEA                                            | 5                       |
|                  | DHA-5-HT                                        | 1                       |
| MDA-MB-231-CM    | BRL                                             | 10                      |
|                  | DHEA                                            | 5                       |
|                  | DHA-5-HT                                        | 1                       |
